# Supplementary material for: Pathogenesis of natural goat scrapie: modulation by host PRNP genotype and effect of co-existent conditions
Source: PubMed Central journal article supplement — Vet Res. 2010 Apr 8;41(4):48. doi: 10.1051/vetres/2010020 (PMC2865875; doi:10.1051/vetres/2010020), 2010-04-08
Supplement: vetres-41-48-s1.pdf [file vetres-41-48-s1.pdf]

On line material

**Table S1a.** Detailed results of IHC examinations in 40 goats homozygous for isoleucine at codon 142.

| Sheep ID | Age | Brain | TSC | ENS | RphLN | PITo | MamLN | DjeLN | 3rdEy | PscLN | PPs | PrfLN | RMLT | Splee |
|----------|-----|-------|-----|-----|-------|------|-------|-------|-------|-------|-----|-------|------|-------|
| G08-1116 | 78  |       |     |     | 2     | 1.5  | 0.2   | 1.5   | 1.5   | 1.5   |     | 2     |      |       |
| G08-1119 | 84  |       |     |     | 2.5   | 2.5  | 1.5   |       | 1     | 1.5   | 2   |       | 0.5  | 2.5   |
| G08-1127 | 65  |       |     |     | 2.5   | 1.5  |       |       | 1.5   |       |     |       | 0.5  |       |
| G08-1129 | 66  |       |     |     | 1.5   | 1.5  | 1.5   |       |       | 2     |     | 0.2   |      |       |
| G08-1143 | 102 |       |     | 0.2 | 1.5   | 1.5  | 1     | 1     | 1     | 1.5   | 1   | 1.5   | 1    |       |
| G08-1148 | 48  |       |     |     | 1     | 1.5  |       |       |       |       |     |       |      |       |
| G08-1150 | 41  |       |     |     |       |      |       |       |       | 1.5   |     |       |      |       |
| G08-1344 | 53  |       |     |     | 2     |      | 1.5   | 1.5   | 0.5   | 0.2   | 1.5 | 0.2   | 1.5  | 1.5   |
| G08-1360 | 90  |       |     |     | 2     |      |       |       |       |       |     |       |      |       |
| G08-1361 | 66  |       |     |     | 1.5   | 1    |       |       |       |       | 0.2 | 0.2   |      |       |
| G08-1372 | 65  |       |     |     | 2     | 2.5  | 1     | 1     |       |       |     | 1.5   |      |       |
| G08-1374 | 23  |       |     | 0.2 | 3     | 3    | 2     | 2.5   | 2     | 3     | 2   | 3     |      |       |
| G08-1384 | 78  |       |     |     |       | 0.5  | 0.5   |       |       |       |     | 0.5   |      |       |
| G08-1389 | 48  |       |     |     | 2     | 2    | 1.5   | 1.5   | 2.5   | 1.5   | 2   | 1.5   | 1.5  |       |
| G08-1396 | 109 |       |     |     | 2     | 2.5  | 2     | 1.5   | 2     | 1.5   | 2   |       | 1.5  | 2     |
| G08-1401 | 109 |       |     |     | 0.2   |      |       |       |       |       |     |       |      |       |
| G08-1410 | 66  |       |     |     | 1.5   |      |       |       |       |       |     |       |      |       |
| G08-1418 | 66  |       |     | 0.5 | 2.5   | 1    | 2     |       |       | 1.5   |     |       |      |       |
| G08-1427 | 41  |       |     |     | 2     | 2    | 1.5   | 1.5   | 2.5   | 1.5   | 2.5 | 1.5   | 2.5  | 1     |
| G08-1430 | 102 |       |     |     | 1.5   | 1.5  | 1     |       | 1.5   | 1     | 1.5 | 1     |      |       |
| G08-1453 | 78  |       |     |     | 2     | 2    | 1     |       | 2     | 1.5   |     | 2     |      |       |
| G08-1461 | 36  |       |     |     | 0.2   | 1    |       |       |       |       |     |       |      |       |
| G08-1464 | 40  |       |     |     | 1.5   | 1.5  |       | 0.2   | 1     | 1     |     |       |      |       |
| G08-1472 | 102 |       |     |     | 2     | 2    |       |       |       |       |     |       |      |       |
| G08-1484 | 65  |       |     |     | 1.5   | 1.5  | 0.2   | 1     | 2     |       | 2   |       | 1    | 1.5   |
| G08-1490 | 41  |       |     |     | 3     | 1.5  | 1.5   | 1     | 1.5   | 2.5   | 2   | 2     | 0.5  | 0.2   |
| G08-1353 | 66  | 0.2   |     |     | 1     | 1    | 1     | 1     | 2.5   |       | 2   |       | 1.5  | 0.2   |
| G08-1352 | 109 | 0.5   |     | 0.5 | 1.5   | 2    | 1     | 2     | 2.5   | 2     | 2.5 |       | 1.5  |       |
| G08-1429 | 101 | 0.7   |     |     | 2.5   | 2.5  | 1.5   | 2.5   | 2.5   | 0.5   | 2   | 1.5   | 3    |       |
| G08-1446 | 84  | 1.2   | 1   | 0.5 | 1.5   | 1.5  | 0.2   | 1.5   | 2     |       |     | 1     |      | 0.2   |
| G08-1439 | 114 | 1.7   | 0.2 |     | 2     | 2.5  | 2.5   | 1.5   | 2.5   | 2     | 0.5 | 1.5   |      |       |
| G08-1420 | 78  | 2.1   | 1   | 2   | 2.5   | 2.5  | 2     | 2.5   | 2.5   | 2.5   | 2.5 | 1.5   | 3    | 1.5   |
| G08-1433 | 114 | 4.5   | 1   | 0.5 | 1.5   | 1.5  | 2     | 1.5   | 1.5   | 1     | 1.5 |       |      |       |
| G08-1460 | 109 | 7.0   | 1.5 |     | 1.5   | 2    | 2     | 1.5   | 2.5   |       | 2   |       | 0.5  |       |
| G08-1373 | 108 | 12.0  | 2   | 1.5 | 1.5   | 1.5  | 0.2   | 1.5   | 1.5   | 1.5   | 2   |       | 1    | 1     |
| G08-1386 | 84  | 12.8  | 2   | 2.5 | 2.5   | 2.5  | 1.5   | 2.5   | 2     | 2.5   | 2.5 | 2.5   | 2.5  | 1.5   |
| G08-1407 | 53  | 19.5  | 3   | 2.5 | 2.5   | 2.5  | 2.5   | 2.5   | 2.5   | 2.5   | 2.5 | 3     | 2.5  | 1.5   |
| G08-1447 | 49  | 20.0  | 3   | 2   | 1.5   | 1.5  | 2     | 1.5   | 1.5   | 1     | 1.5 | 1     |      | 1.5   |
| G08-1469 | 102 | 20.0  | 3   | 2   | 2.5   | 2    | 1.5   | 1.5   | 2.5   | 2.5   | 0.5 | 2     |      | 1.5   |
| G08-1475 | 47  | 27.5  | 3   | 1.5 | 2     | 2    | 1.5   | 2     | 2.5   | 1.5   | 1.5 | 1.5   | 2.5  | 1     |

**Table S1b.** Detailed results of IHC examinations in 32 goats carrying the methionine allele at codon 142.

| Sheep ID | Age | Brain | TSC | ENS | RphLN | PITo | MamLN | DjeLN | 3rdEy | PscLN | PPs | PrfLN | RMLT | Splee |
|----------|-----|-------|-----|-----|-------|------|-------|-------|-------|-------|-----|-------|------|-------|
| G08-1125 | 66  |       |     |     |       | 1.5  |       |       |       |       |     |       |      |       |
| G08-1140 | 66  |       |     |     |       |      |       |       | 1.5   |       |     |       |      |       |
| G08-1358 | 54  |       |     |     | 1     | 1.5  |       | 0.2   |       |       |     |       |      |       |
| G08-1367 | 54  |       |     |     | 2     | 1.5  |       |       | 0.5   |       |     |       |      |       |
| G08-1465 | 101 |       |     |     |       |      |       |       |       | 1     |     |       |      |       |
| G08-1489 | 40  |       |     |     | 1     | 1    |       |       |       |       |     |       |      |       |
| G08-1497 | 40  |       |     |     | 2     | 1.5  | 0.2   |       |       |       |     |       |      |       |
| G08-1425 | 101 |       |     |     | 1.5   | 1.5  | 0.2   | 1.5   |       | 1.5   |     | 1     |      |       |
| G08-1449 | 40  | 0.2   |     |     | 1     | 1    | 0.2   |       |       |       |     |       |      |       |
| G08-1114 | 41  | 0.5   |     |     | 2     | 2.5  | 2.5   | 1     | 1.5   | 1     | 0.5 | 1.5   | 0.2  | 2     |
| G08-1340 | 40  | 0.5   |     |     | 1.5   |      |       |       |       |       |     |       |      |       |
| G08-1351 | 40  | 0.5   |     |     |       |      |       |       |       |       |     |       |      |       |
| G08-1391 | 114 | 0.5   |     |     | 2.5   | 2.5  | 1     | 2.5   | 2.5   |       | 2.5 |       | 1    | 1.5   |
| G08-1398 | 42  | 1.5   | 0.5 |     | 1.5   | 2    | 0.2   | 1     |       | 1.5   |     |       |      | 1     |
| G08-1445 | 48  | 1.5   |     |     |       |      |       |       |       |       |     |       |      |       |
| G08-1126 | 102 | 1.7   |     | 0.5 | 2     | 2    | 0.2   | 2     | 2.5   | 1.5   | 1.5 |       |      | 1.5   |
| G08-1377 | 78  | 2.0   |     |     |       |      |       |       |       |       |     |       |      |       |
| G08-1481 | 40  | 2.1   | 0.2 | 0.5 | 1.5   | 2    | 1.5   | 1.5   | 2.5   |       | 2   | 1     | 0.5  | 1     |
| G08-1436 | 41  | 2.2   | 1   |     | 2.5   | 2.5  | 2.5   | 2.5   | 2     | 2     | 2   | 1.5   | 2    |       |
| G08-1365 | 65  | 2.5   | 1   | 0.2 | 1.5   | 1.5  |       | 1     | 2     |       |     |       |      |       |
| G08-1383 | 40  | 2.5   | 0.2 | 1   | 2     | 2.5  | 0.2   | 2     |       | 2     | 2.5 | 1.5   | 2.5  | 1.5   |
| G08-1348 | 66  | 3.0   |     |     |       | 0.2  |       |       |       |       |     |       |      |       |
| G08-1431 | 65  | 3.0   |     | 1   | 2.5   | 2.5  | 2     | 2.5   | 2.5   | 2     | 2.5 | 1     | 2.5  | 2     |
| G08-1402 | 41  | 3.0   |     |     |       |      |       |       |       |       |     |       |      |       |
| G08-1415 | 41  | 3.5   |     |     | 1.5   | 1.5  | 1     | 1.5   | 1.5   | 1     | 2   |       | 1.5  | 0.2   |
| G08-1423 | 48  | 3.5   | 2   |     | 1.5   | 1.5  | 1     | 2     |       |       | 0.2 |       |      |       |
| G08-1349 | 41  | 4.0   | 1   | 2   | 3     | 3    | 0.2   | 3     | 2.5   | 2.5   | 2.5 | 0.2   | 1    | 0.2   |
| G08-1451 | 41  | 4.0   | 1.5 | 1   | 2.5   | 2.5  | 1     | 2.5   | 2.5   | 1.5   | 2.5 | 1     | 2.5  | 1.5   |
| G08-1131 | 41  | 5.5   | 1   | 1   | 2     | 2    | 1     | 2     | 2.5   | 2     | 2.5 | 0.2   | 0.5  | 0.2   |
| G08-1494 | 109 | 6.5   | 2   | 1.5 | 2.5   | 2.5  | 1.5   | 2.5   | 1     | 1.5   | 1.5 | 2     | 1.5  | 1     |
| G08-1368 | 47  | 7.2   | 0.5 | 0.2 | 2     | 2    |       | 2     | 1     |       |     | 1     | 0.5  |       |
| G08-1495 | 85  | 10.4  | 2   | 1.5 | 0.2   | 1.5  | 0.2   | 1.5   |       |       |     |       |      |       |

Age, in months. Brain, cumulative PrP<sup>d</sup> score in the 10 areas examined. TSC, thoracic spinal cord. ENS, enteric nervous system. RphLN, retropharyngeal lymph node (LN). PITo, palatine tonsil, MamLN, mammary LN. DjeLN, distal jejunal LN. 3rdEy, third eyelid. PscLN, prescapular LN. PPs, Peyer's patches. PrfLN, prefemoral LN. RMLT, recto-anal mucosa-associated lymphoid tissue. Splee, spleen. Blank cells, absence of detectable PrP<sup>d</sup>. Black cells, tissue not available for examination. Figures for TSC, ENS and the different LRS tissues represent a subjective PrP<sup>d</sup> accumulation score from 0.2 (trace) to 3 (severe).

**Table SII.** Relationship between enteritis, scrapie infection and accumulation of PrP<sup>d</sup> in the Peyer's patches.

|             | Enteritis            |               |              |
|-------------|----------------------|---------------|--------------|
|             | Severe/granulomatous | mild/moderate | no enteritis |
| Scrapie +ve | 5                    | 29            | 38           |
| PPs +ve     | 4                    | 16            | 20           |
| PPs -ve     | 1                    | 13            | 18           |
| Scrapie -ve | 3                    | 61            | 64           |

PPs, distal jejunum Peyer's patches.

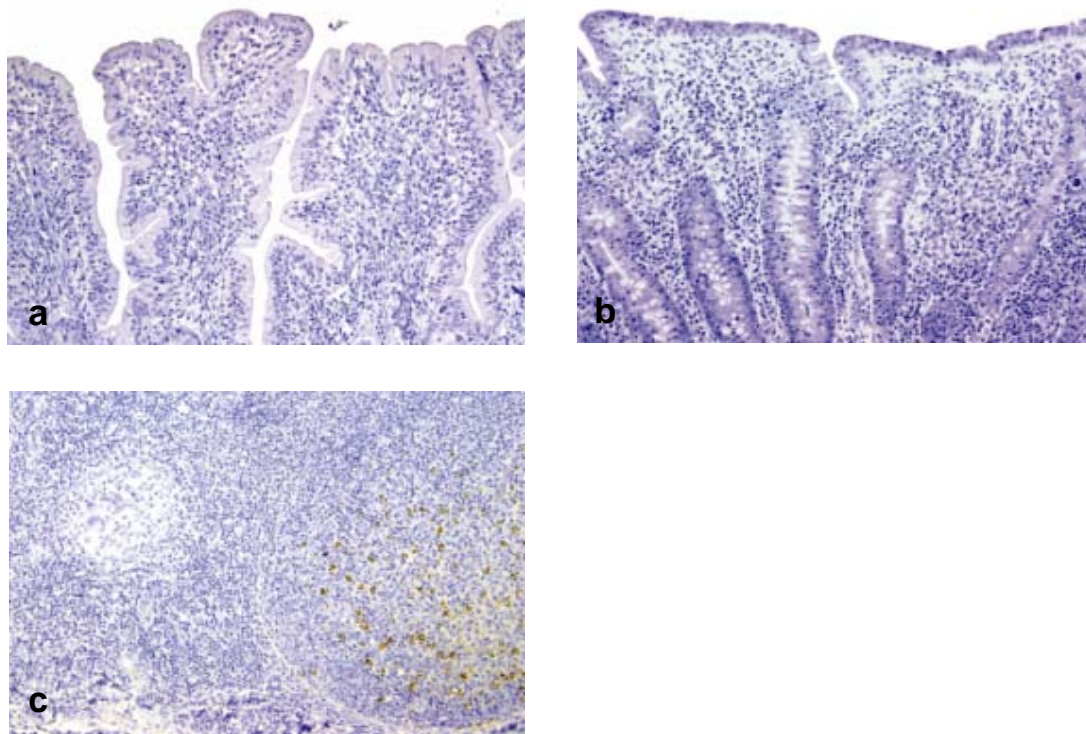

**Figure S1.** Chronic enteritis (atrophy and fusion of ileal villi, and mononuclear inflammatory cell infiltrates in lamina propria) in a scrapie-infected goat (**a**) and in a non-infected animal (**b**). Granulomatous enteritis of undetermined origin (not mycobacterial) in a scrapie-infected goat showing PrP<sup>d</sup> accumulation in Peyer's patches (**c**). IHC with Bar224 PrP antibody and haematoxylin counterstaining (x10).

**Table III.** Relationship between CAEV seropositivity and mastitis, scrapie and accumulation of PrP<sup>d</sup> in the mammary gland.

|             | CAEV +ve |         | CAEV -ve |         |    |
|-------------|----------|---------|----------|---------|----|
|             | LPM +ve  | LPM -ve | LPM +ve  | LPM -ve |    |
| Scrapie +ve | 13       | 19      | 0        | 40      |    |
| MG +ve      | 5        | 0       |          | 0       |    |
| MG -ve      | 8        | 19      |          | 40      |    |
| Scrapie -ve | nd       | 50*     | nd       | 78*     | nd |

CAEV, caprine arthritis-encephalitis virus; LPM, lymphoproliferative mastitis; MG, mammary gland (results refer to presence or absence of PrP<sup>d</sup>); nd, IHC examination of mammary gland not done on scrapie negative goats.

\* values refer to CAEV serology in the 128 scrapie negative goats.

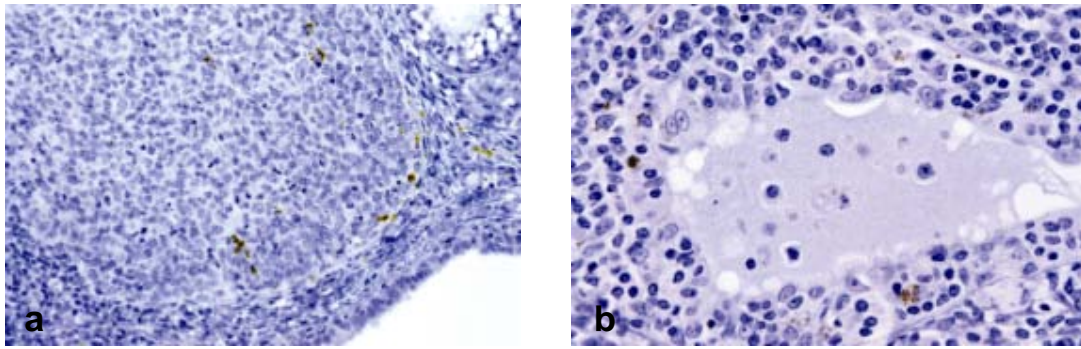

**Figure S2.** Accumulation of PrP<sup>d</sup> in the mammary gland of goats that were infected with scrapie and CAEV and had developed a lymphoproliferative interstitial mastitis. PrP<sup>d</sup> within cells in the juxta-ductal proliferating lymphoid follicles (a), and within cells that appear to cross the ductal epithelium (b). IHC with Bar224 PrP antibody and haematoxylin counterstaining (magnification: a,  $\times 20$ ; b,  $\times 40$ ).
